# Supplementary material for: Identification of candidate genes related to pancreatic cancer based on analysis of gene co-expression and protein-protein interaction network
Source: PubMed Central journal article supplement (PMC5642621; doi:10.18632/oncotarget.20537), 2017-08-24
Supplement: oncotarget-08-71105-s001.pdf [file oncotarget-08-71105-s001.pdf]

## **Identification of candidate genes related to pancreatic cancer based on analysis of gene co-expression and protein-protein interaction network**

### **SUPPLEMENTARY MATERIALS**

**Supplementary Table 1: Pearson correlation coefficients between the expression of the 6 candidate genes and their corresponding seed genes**

See Supplementary File 1

**Supplementary Table 2: Correlation analysis of the 6 candidate genes with gender, alcohol and smoking history**

| Clinical features | BARD1      | S100A14  | MST1R    | KRT19    | RNF168       | LGALS1    |
|-------------------|------------|----------|----------|----------|--------------|-----------|
| Male              | -0.1936706 | 2.910202 | 3.526002 | 3.965755 | -0.070963473 | 0.5955816 |
| Female            | -0.1930404 | 2.65148  | 3.372016 | 3.861836 | 0.002650813  | 0.8130857 |
| P-value           | 0.9973     | 0.4898   | 0.6021   | 0.7231   | 0.5468       | 0.1974    |
| alcohol(Yes)      | -0.2309503 | 2.796914 | 3.483311 | 4.012401 | -0.08918733  | 0.7136621 |
| alcohol(No)       | -0.1576431 | 2.783906 | 3.445058 | 3.79862  | -0.01558954  | 0.6229395 |
| P-value           | 0.7255     | 0.9745   | 0.9038   | 0.5122   | 0.5881       | 0.6113    |
| smoker            | -0.1477071 | 2.85957  | 3.663028 | 4.100958 | -0.00385852  | 0.732595  |
| non-smoker        | -0.4100906 | 2.606145 | 3.1      | 3.778681 | -0.18000173  | 0.7088596 |
| P-value           | 0.224      | 0.5859   | 0.1276   | 0.3756   | 0.2165       | 0.9073    |

The P-value is computed using t-test, whereas the other values in the table are means of gene expression for each clinical feature group.
